# Supplementary material for: Versatility and stability optimization of flow-focusing droplet generators via quality metric-driven design automation
Source: Royal Society of Chemistry journal article supplement (doi:10.1039/d3lc00189j), 2023-01-01
Supplement: d3lc00189j1.pdf [file d3lc00189j1.pdf]

# Versatility and stability optimization of flow-focusing droplet generators via quality metric-driven design automation

David McIntyre,<sup>a,b</sup> Ali Lashkaripour,<sup>c,d</sup> Diana Arguijo,<sup>a,b</sup> Polly Fordyce,<sup>c,d,e</sup> and Douglas Densmore<sup>\*,b,f</sup>

- a.* Boston University Biomedical Engineering Department, 44 Cummington Mall, Boston, USA.
- b.* Biological Design Center, 610 Commonwealth Ave, Boston, USA.
- c.* Department of Bioengineering, Stanford University, Stanford, CA., USA
- d.* Department of Genetics, Stanford University, Stanford, CA., USA
- e.* Chan-Zuckerberg Biohub, San Francisco, CA., USA
- f.* Boston University Electrical and Computer Engineering Department, 8 Saint's Mary St., Boston, USA.

**Supplementary Table 1:** Overview of all droplet generators used in this study

| Device Description               | Or (um) | Or <sub>L</sub> | W <sub>d</sub> | W <sub>c</sub> | E   | A.R | Ca       | F.R.R |
|----------------------------------|---------|-----------------|----------------|----------------|-----|-----|----------|-------|
| Orthogonal Device #1 (Figure 2)  | 75      | 1               | 2              | 2              | 2   | 1   | .06-1.05 | 10-22 |
| Orthogonal Device #2 (Figure 2)  | 75      | 1.5             | 2.5            | 2.5            | 3   | 1.5 | .06-1.05 | 10-22 |
| Orthogonal Device #3 (Figure 2)  | 75      | 2               | 3              | 3              | 4   | 2   | .06-1.05 | 10-22 |
| tOrthogonal Device #4 (Figure 2) | 75      | 2.5             | 3.5            | 3.5            | 5   | 2.5 | .06-1.05 | 10-22 |
| Orthogonal Device #5 (Figure 2)  | 75      | 3               | 4              | 4              | 6   | 3   | .06-1.05 | 10-22 |
| More Versatile (Figure 3)        | 75      | 3               | 2              | 2              | 4.5 | 1   | .05-1.05 | 2-22  |
| Less Versatile (Figure 3)        | 150     | 1               | 4              | 4              | 2   | 3   | .05-1.05 | 2-22  |
| More Versatile (Figure 4)        | 150     | 2               | 2              | 2              | 5   | 1   | .05-1.05 | 2-22  |
| Less Versatile (Figure 4)        | 175     | 1.5             | 2.5            | 2.5            | 2   | 1   | .05-1.05 | 2-22  |
| More stable (Figure 5)           | 175     | 3               | 2              | 2              | 3.5 | 1.5 | .05-1.05 | 2-22  |
| Less stable (Figure 5)           | 75      | 1               | 3.5            | 3.5            | 2   | 3   | .05-1.05 | 2-22  |
| More stable (Figure 6)           | 175     | 2.5             | 3              | 2.9            | 6   | 1   | .05-1.05 | 2-22  |
| Less stable (Figure 6)           | 175     | 3               | 3.3            | 3              | 2   | 1.5 | .05-1.05 | 2-22  |

*Abbreviations:* **Or** - orifice width; **Or<sub>L</sub>** -normalized orifice length; **W<sub>d</sub>**– normalized dispersed phase (water) input; **W<sub>c</sub>** – normalized continuous phase (oil) input; **E** – Expansion ratio; **A.R** – Aspect ratio; **Ca** - capillary number; **F.R.R** – Flow rate ratio

**Supplementary Table 2:** Correlation coefficients (R<sup>2</sup>) for design parameters and versatility scores in the dripping regime

|                      | Or (um) | Or <sub>L</sub> | W <sub>d</sub> | W <sub>c</sub> | E     | A.R   |
|----------------------|---------|-----------------|----------------|----------------|-------|-------|
| <b>Overall Score</b> | -0.19   | 0.41            | -0.13          | -0.18          | 0.17  | -0.51 |
| <b>Size Score</b>    | 0.57    | -0.06           | -0.01          | -0.20          | -0.02 | 0.58  |
| <b>Rate Score</b>    | -0.53   | 0.39            | -0.05          | -0.03          | 0.012 | -0.60 |

*Interpreting R<sup>2</sup> values:* **-1.0 < R<sup>2</sup> < -0.7** – strong negative correlation; **-0.7 < R<sup>2</sup> < -0.5** – moderate negative correlation; **-0.5 < R<sup>2</sup> < -0.3** – weak negative correlation; **-0.3 < R<sup>2</sup> < 0.3** – negligible correlation; **0.3 < R<sup>2</sup> < 0.5** – weak positive correlation; **0.5 < R<sup>2</sup> < 0.7** – moderate positive correlation; **0.7 < R<sup>2</sup> < 1.0** – strong positive correlation

**Supplementary Table 3:** Correlation coefficients (R<sup>2</sup>) for design parameters and versatility scores in the jetting regime

|                      | Or (um) | Or <sub>L</sub> | W <sub>d</sub> | W <sub>c</sub> | E     | A.R   |
|----------------------|---------|-----------------|----------------|----------------|-------|-------|
| <b>Overall Score</b> | -0.05   | 0.06            | -0.58          | 0.33           | -0.35 | -0.05 |
| <b>Size Score</b>    | 0.54    | -0.15           | -0.10          | -0.23          | 0.66  | 0.26  |
| <b>Rate Score</b>    | -0.29   | 0.08            | -0.46          | 0.3            | -0.59 | -0.18 |

**Supplementary Table 4:** Correlation coefficients (R<sup>2</sup>) for design parameters and stability scores in the dripping and jetting regime

|                 | Or (um) | Or <sub>L</sub> | W <sub>d</sub> | W <sub>c</sub> | E    | A.R  | Ca    | F.R.R |
|-----------------|---------|-----------------|----------------|----------------|------|------|-------|-------|
| <b>Dripping</b> | 0.54    | 0.16            | -0.10          | 0.09           | 0.09 | 0.06 | -0.21 | 0.01  |
| <b>Jetting</b>  | 0.47    | 0.02            | -0.26          | 0.17           | 0.00 | 0.33 | 0.46  | -0.06 |

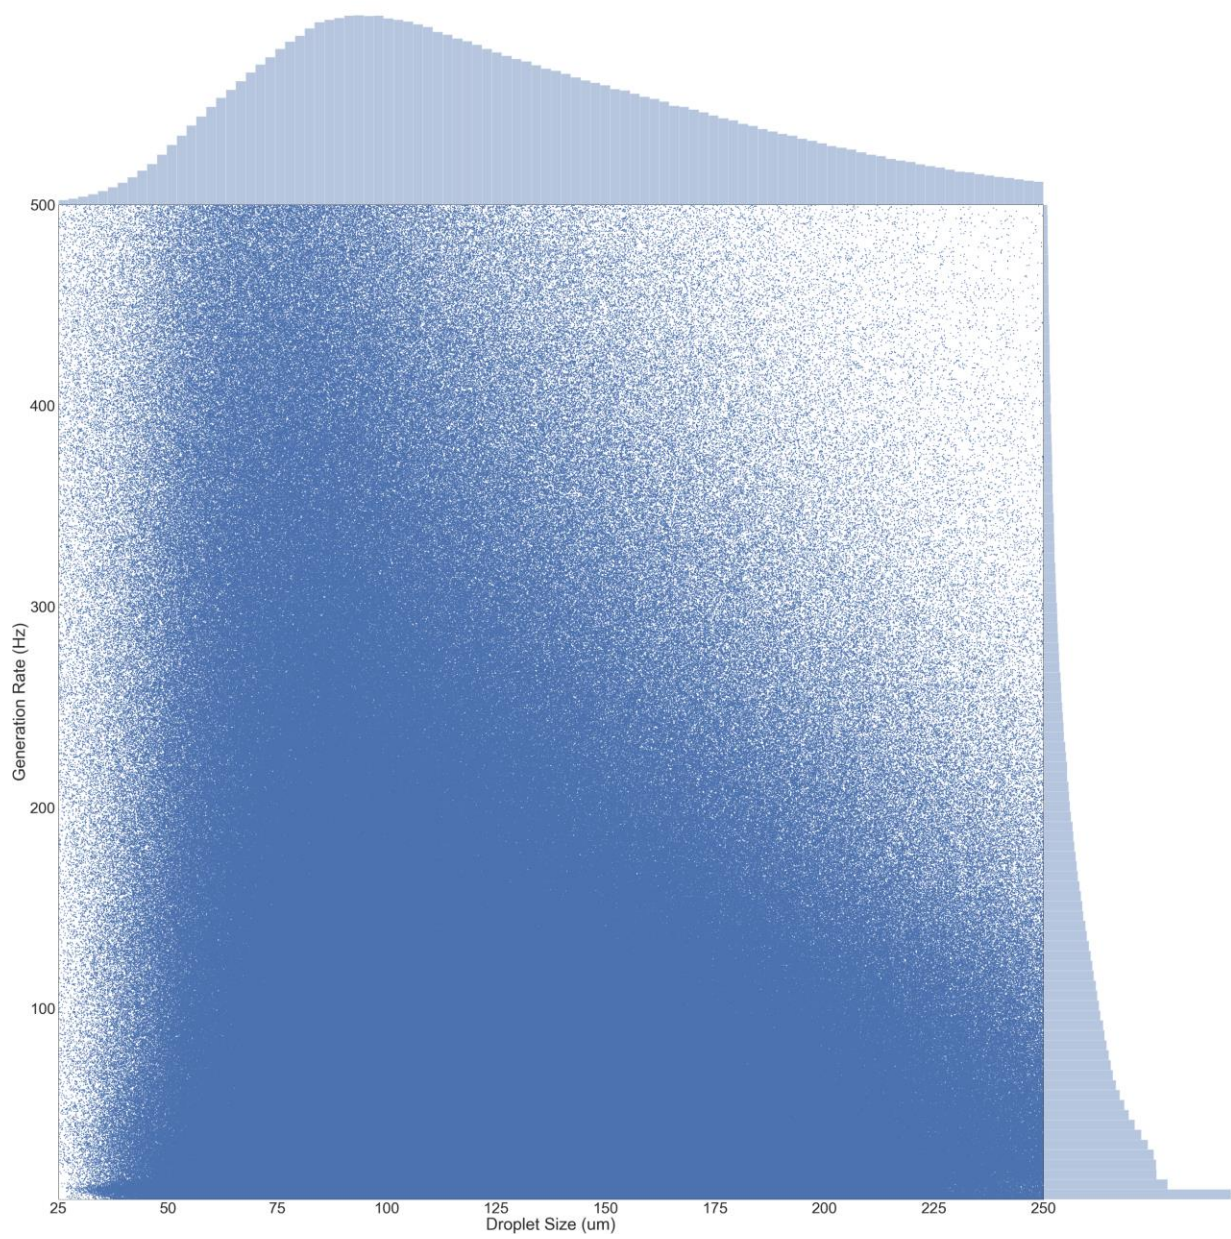

**Supplementary figure S1:** 2D distribution of droplet size and rate from the 4.2 million datapoints used in this study.

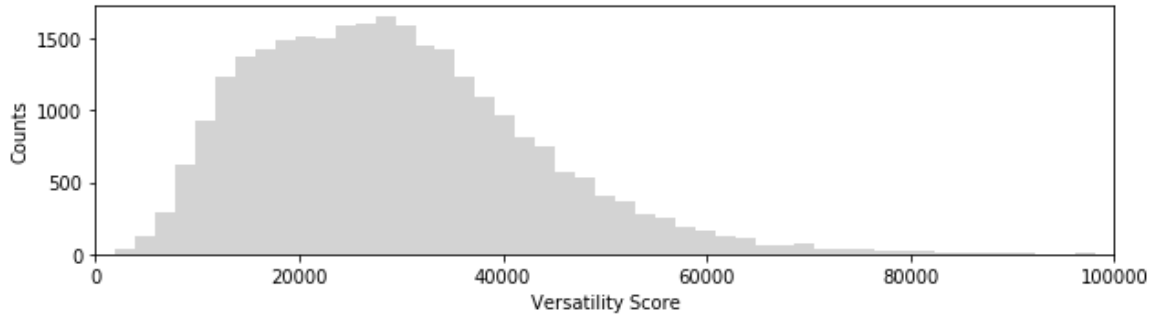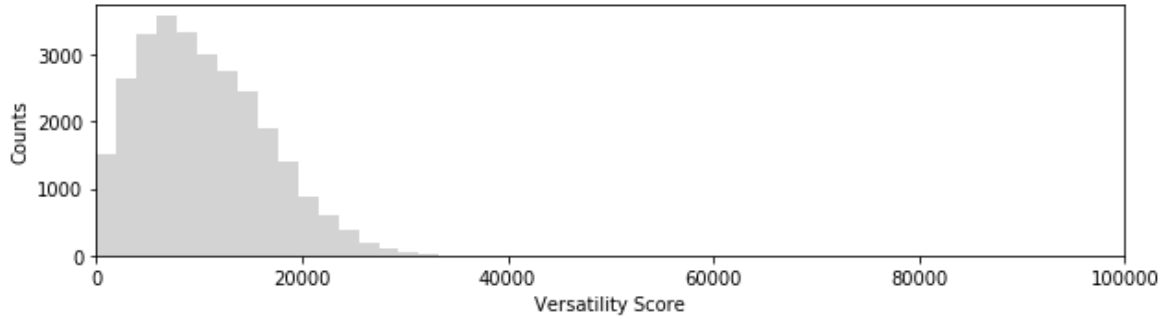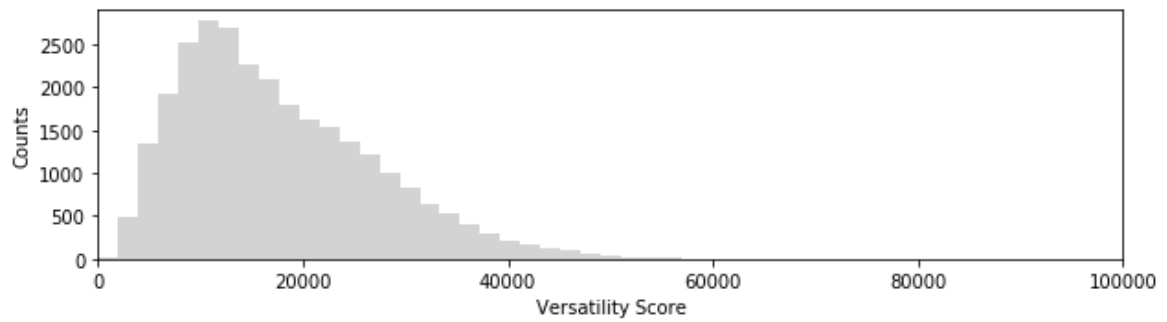

*Supplementary Figure S2: Distribution of versatility scores in both regimes (top), dripping regime (middle), and jetting regime (bottom).*

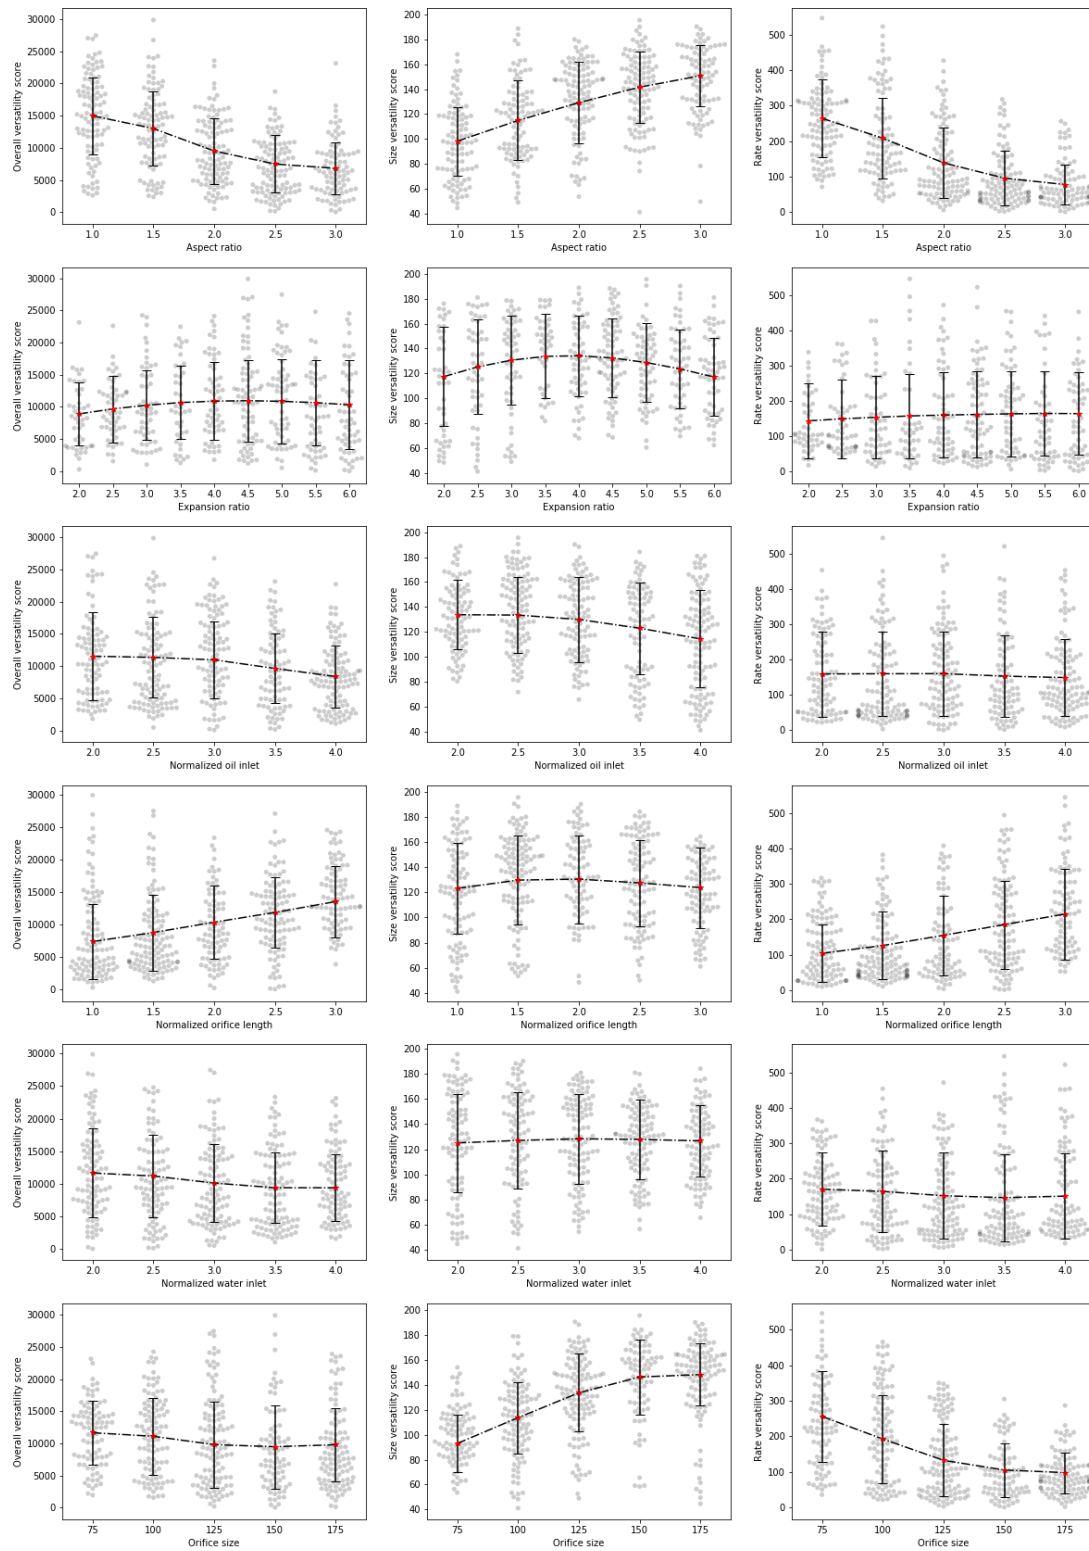

**Supplementary Figure S3: Diameter, generation rate, and overall versatility in the dripping regime.**

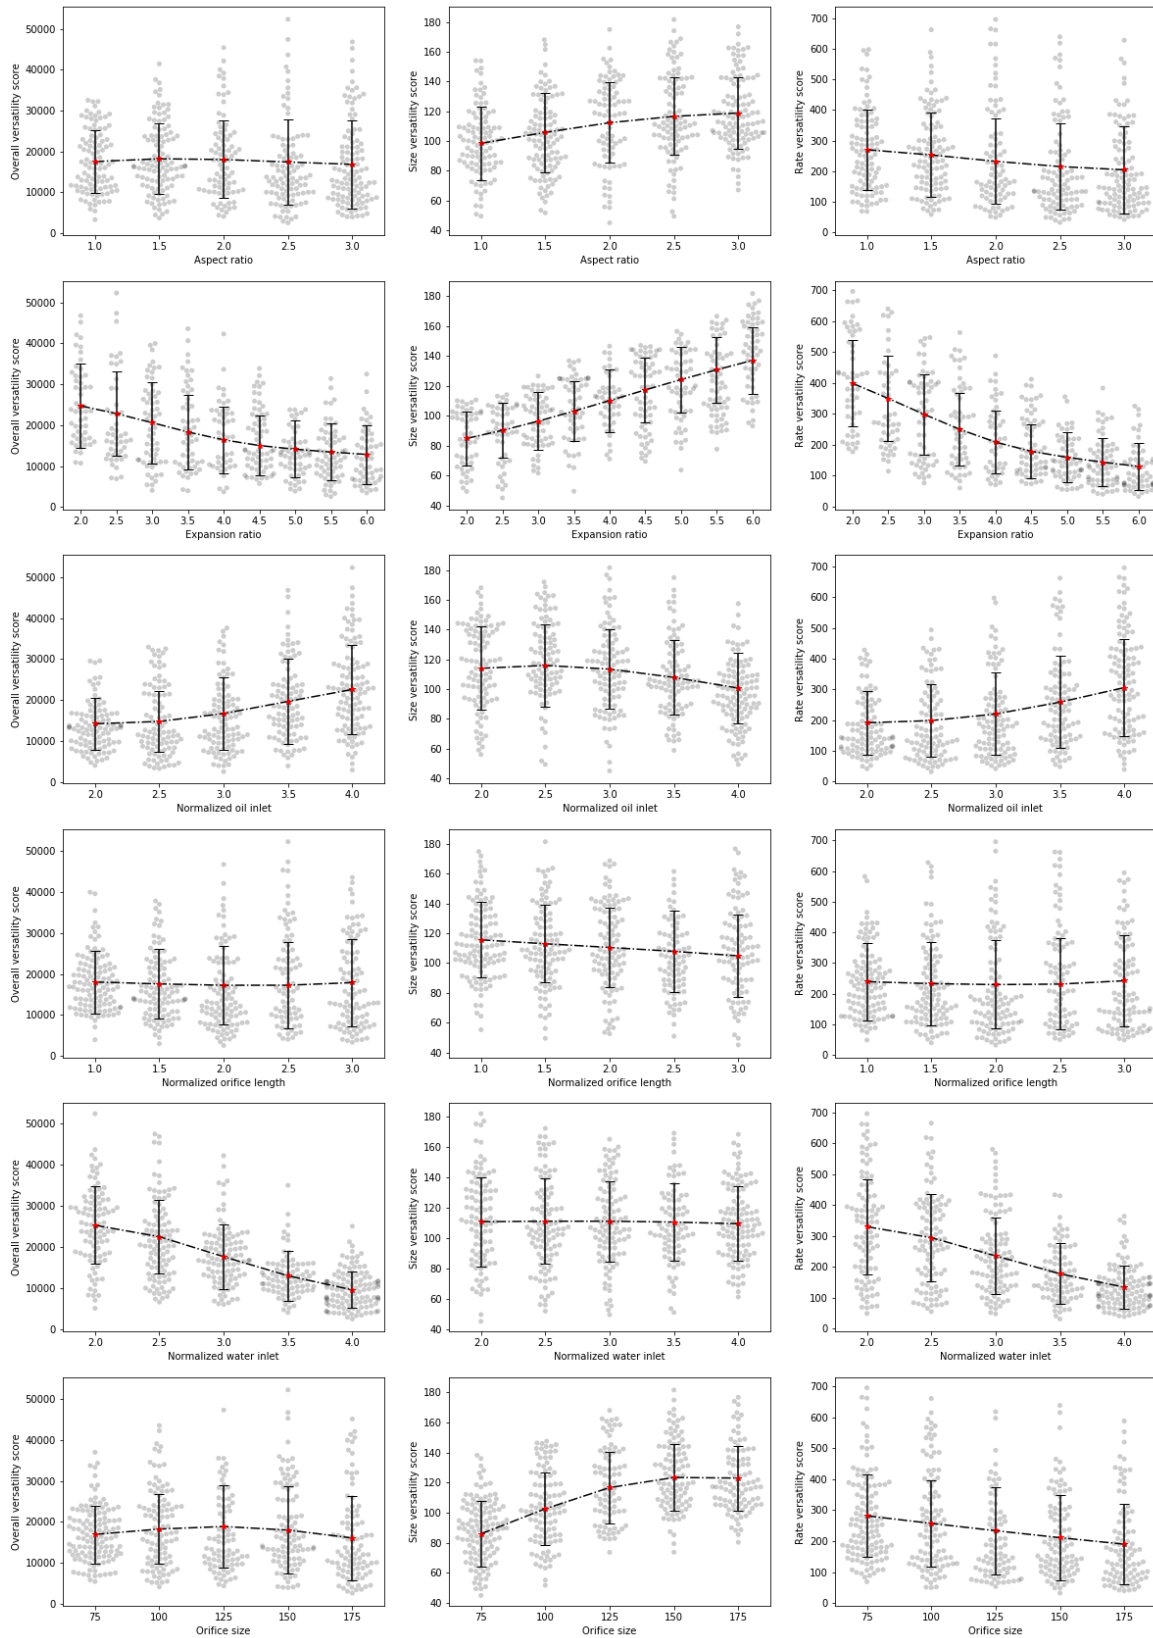

**Supplementary Figure S4: Main effect analysis of diameter, generation rate, and overall versatility in the jetting regime.**

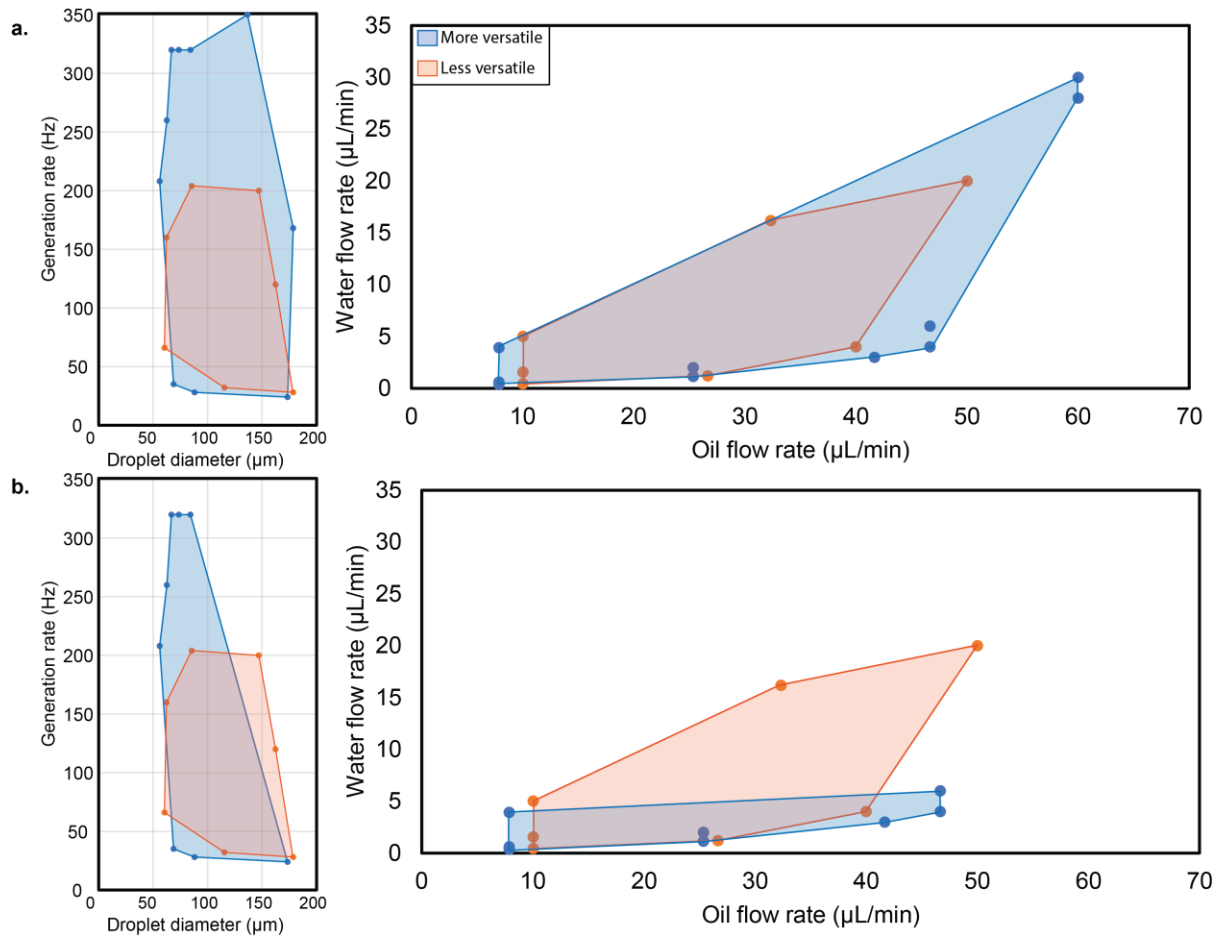

**Supplementary Figure S5: Summary of flow rate combinations used for the more and less versatile devices in main figures 2 and 3**

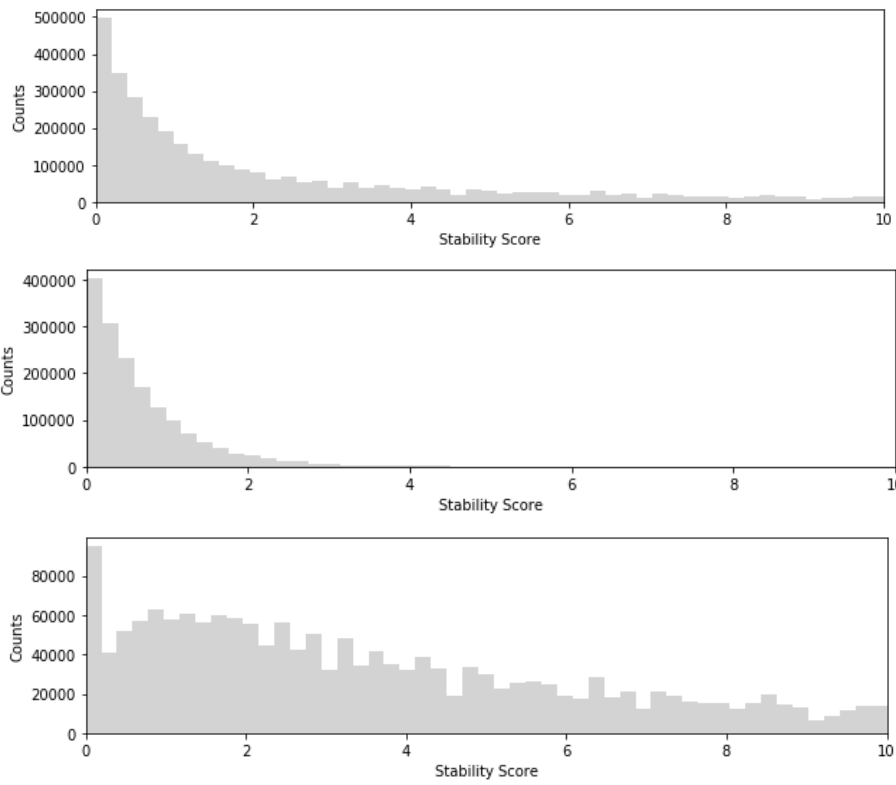

**Supplementary Figure S6: Distribution of stability scores in both regimes (top), dripping regime (middle), and jetting regime (bottom).**



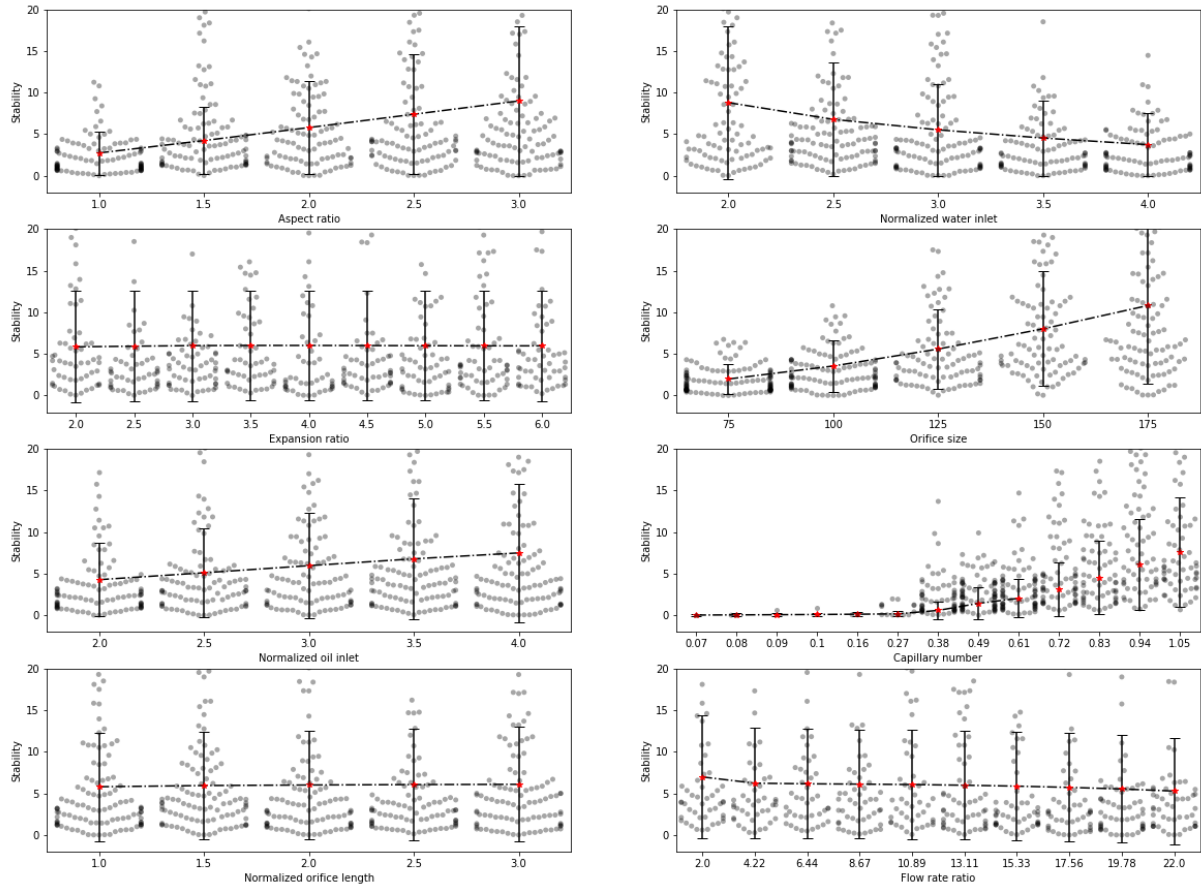

*Supplementary Figure S7: Main effect analysis of stability in the jetting regime.*

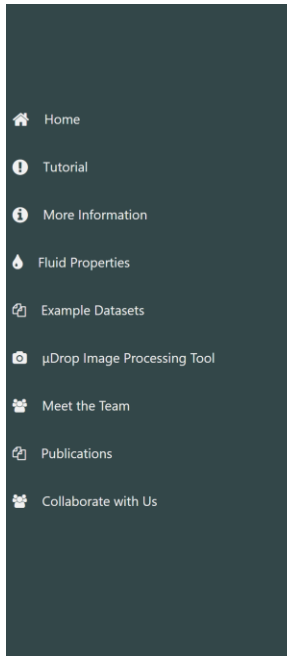

## Design Quality Metrics:

Using 3 candidate designs, the versatility and stability metrics of each candidate generator was calculated. Output designs were ranked according to **Stability**. [CLICK HERE](#) to download the designs and quality metrics for all candidates. Below, you can see the performance ranges of the top-ranked devices regime (versatility) as well as how close the device is to a regime boundary (stability). More info on this methodology can be found here (Note: this link currently not active, publication is in review).

### Droplet Generator Design:

| Versatility (in both regimes): |            |            | Stability:      |
|--------------------------------|------------|------------|-----------------|
| Overall score                  | Size score | Rate score | Stability score |
| 33803.148                      | 162.83     | 322.064    | 0.387           |

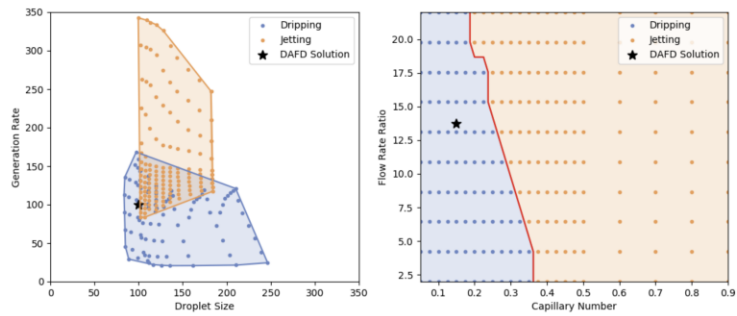

**Supplementary Figure S8: DAFD Quality metric design report.** If specified by the user, upon completion of metrics-driven design automation, a companion report will be generated to contextualize the results for the user.

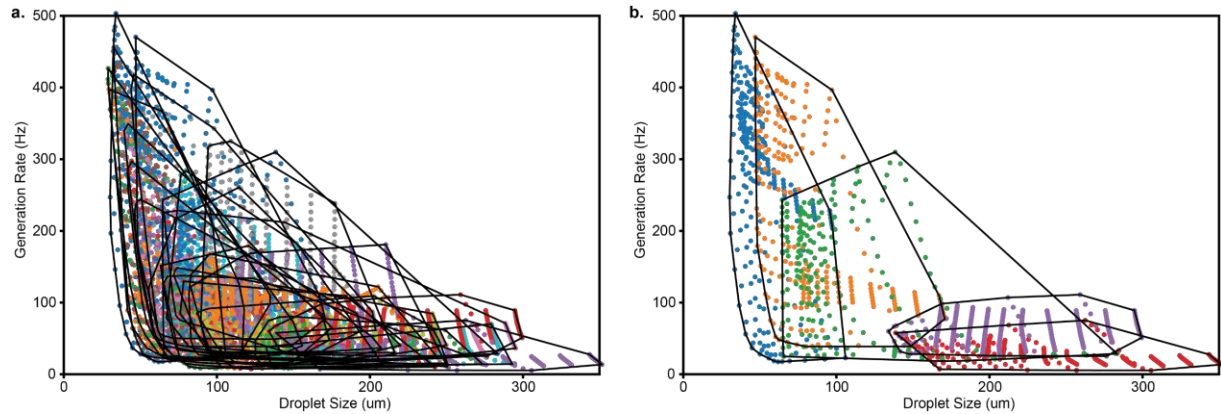

**Supplementary Figure S9: Design space coverage of (a) the 25 orthogonal devices used in DAFD and (b) a selection of 5 of the orthogonal devices that can cover more than 99% of the design space.**
